# Supplementary material for: Nickel(ii) and iron(ii) triple helicates assembled from expanded quaterpyridines incorporating flexible linkages
Source: Royal Society of Chemistry journal article supplement (doi:10.1039/c1dt10820d), 2011-01-01
Supplement: c1dt10820d.pdf [file c1dt10820d.pdf]

## Electronic Supplementary Information

### Nickel(II) and iron(II) triple helicates assembled from expanded quaterpyridines incorporating flexible linkages†

Christopher R. K. Glasson,<sup>a</sup> George V. Meehan,<sup>\*a</sup> Cherie A. Motti,<sup>b</sup> Jack K. Clegg,<sup>c,d</sup> Peter Turner,<sup>c</sup> Paul Jensen<sup>c</sup> and Leonard F. Lindoy<sup>\*c</sup>

<sup>a</sup>School of Pharmacy and Molecular Sciences, James Cook University, Townsville, Qld. 4814, Australia. E-mail: [George.Meehan@jcu.edu.au](mailto:George.Meehan@jcu.edu.au)

<sup>b</sup>The Australian Institute of Marine Science, Townsville, 4810, Qld. Australia.

<sup>c</sup>School of Chemistry, F11, The University of Sydney, NSW 2006, Australia. Fax: +61 2 93513329; E-mail: [lindoy@chem.usyd.edu.au](mailto:lindoy@chem.usyd.edu.au)

<sup>d</sup>Department of Chemistry, The University of Cambridge, Lensfield Rd, Cambridge, UK, CB2 1EW.

#### 1. Mass Spectrum of [Fe<sub>2</sub>(4)<sub>3</sub>](PF<sub>6</sub>)<sub>4</sub>

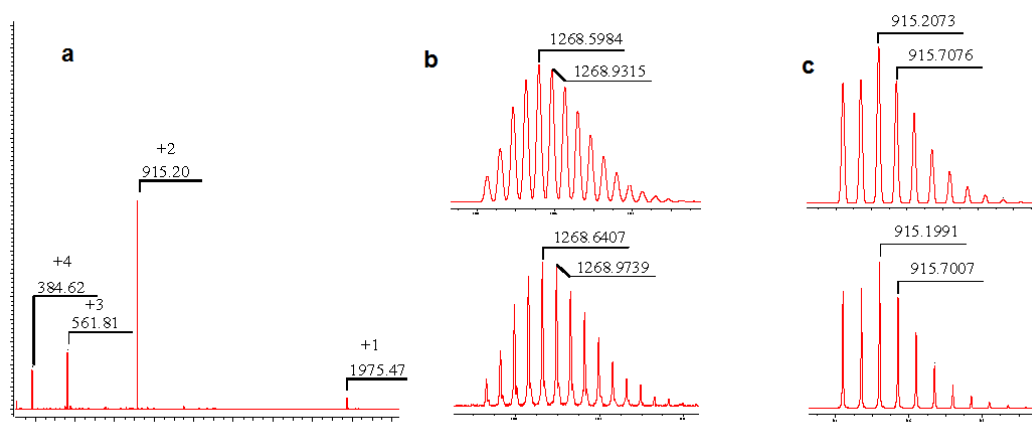

**Fig. 1S** a) ESI-HRMS spectrum of [Fe<sub>2</sub>(4)<sub>3</sub>](PF<sub>6</sub>)<sub>4</sub> showing evidence for the presence of [Fe<sub>4</sub>(4)<sub>6</sub>](PF<sub>6</sub>)<sub>8</sub>, and b) the theoretical and observed isotopic distributions for the +5 ion {[Fe<sub>4</sub>(4)<sub>6</sub>](PF<sub>6</sub>)<sub>3</sub>}<sup>5+</sup>.

## 2. X-ray structure of the $[\text{Ni}_2(\mathbf{6})_3]^+$ cation

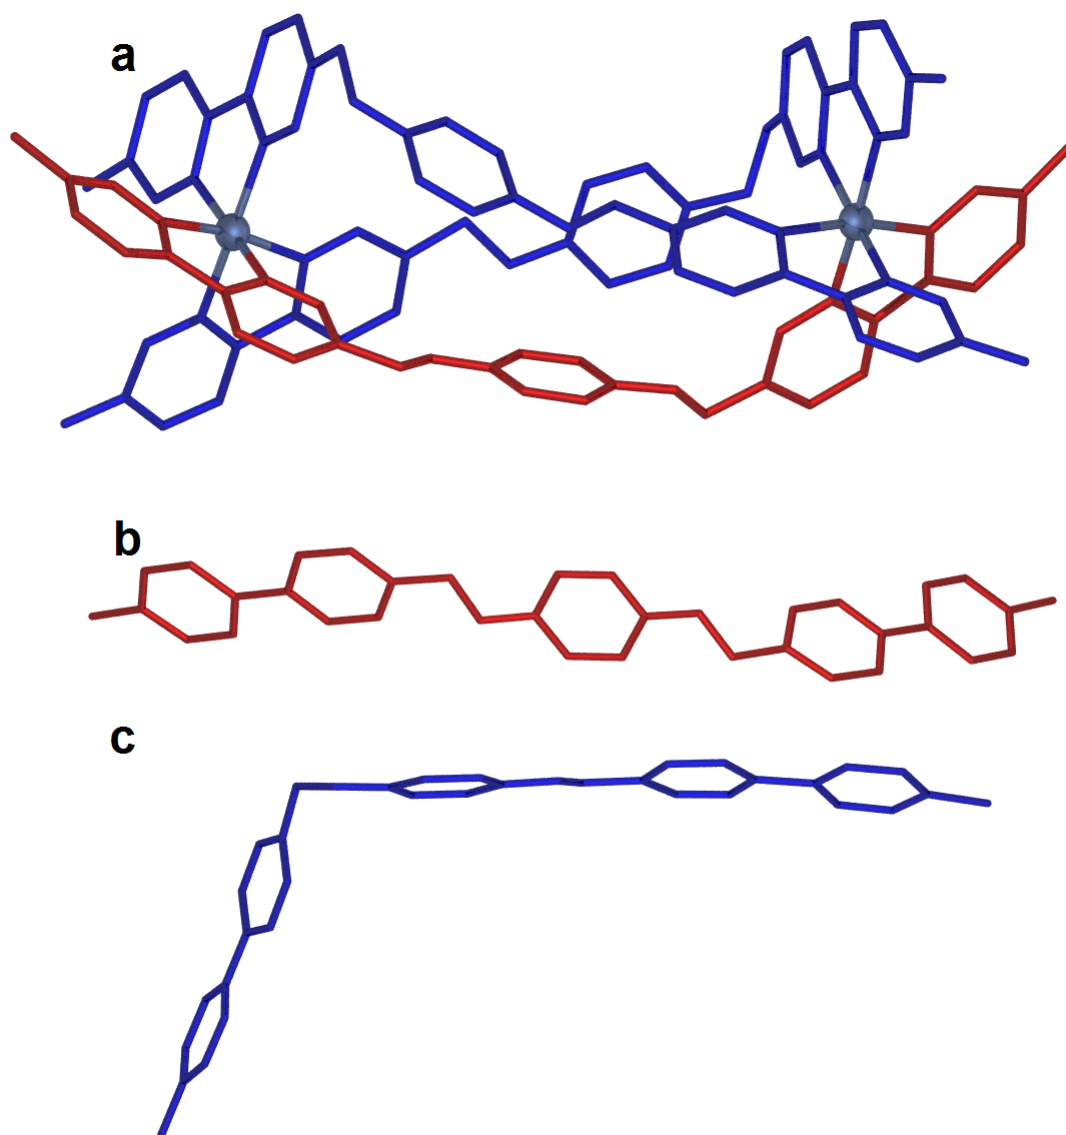

**Fig. S2** a) Stick representation of the x-ray crystal structure of  $[\text{Ni}_2(\mathbf{6})_3](\text{PF}_6)_4 \cdot 1.95\text{MeCN} \cdot 1.2\text{THF} \cdot 1.8\text{H}_2\text{O}$ . Hydrogens, counterions and solvents are removed for clarity; b) and c) illustrate the two bound ligand conformations present in the structure.
